# Supplementary material for: OBP-functionalized/hybrid superparamagnetic nanoparticles for Candida albicans treatment
Source: PubMed Central journal article supplement — RSC Adv. 2021 Mar 17;11(19):11256–65. doi: 10.1039/d1ra01112j (PMC8695780; doi:10.1039/d1ra01112j), 2021-03-17
Supplement: RA-011-D1RA01112J-s001.pdf [file RA-011-D1RA01112J-s001.pdf]

## Electronic Supplementary Information

### **OBP-functionalized/hybrid superparamagnetic nanoparticles for *Candida albicans* treatment**

Nicolò Riboni\*<sup>a</sup>, Costanza Spadini<sup>b</sup>, Clotilde S. Cabassi<sup>b</sup>, Federica Bianchi\*<sup>a,c</sup>, Stefano Grolli<sup>b</sup>, Virna Conti<sup>b</sup>, Roberto Ramoni<sup>b</sup>, Francesca Casoli<sup>d</sup>, Lucia Nasi<sup>d</sup>, César de Julián Fernández<sup>d</sup>, Paola Luches<sup>e</sup> and Maria Careri<sup>a</sup>

- a. University of Parma, Department of Chemistry, Life Sciences and Environmental Sustainability, Parco Area delle Scienze 17/A, 43124 Parma, Italy.
- b. University of Parma, Department of Veterinary Science, Via del Taglio 10, 43126 Parma, Italy.
- c. University of Parma, Interdepartmental Center for Packaging (CIPACK), Parco Area delle Scienze, 43124 Parma, Italy
- d. Institute of Materials for Electronics and Magnetism, Parco Area delle Scienze 37/A, 43124 Parma, Italy.
- e. Center S3, Nanoscience Institute, CNR, via G. Campi 213/A, 41125 Modena, Italy

Corresponding authors:

\*Federica Bianchi: e-mail: federica.bianchi@unipr.it. Phone: +39 0521 905446. Fax: +39 0521 905556

\*Nicolò Riboni: e-mail: nicolo.riboni@unipr.it. Phone: +39 0521 905128.

## Table of Contents

|    |                                                                                                                           |   |
|----|---------------------------------------------------------------------------------------------------------------------------|---|
| 1. | Analysis of solvent residues by SPME-GC-MS analysis .....                                                                 | 3 |
| 2. | Figures.....                                                                                                              | 4 |
|    | Figure S1. XRPD spectrum of bare SPIONs.....                                                                              | 5 |
|    | Figure S2. XPS spectrum of bare SPIONs .....                                                                              | 6 |
|    | Figure S3. ATR/FT-IR spectrum of bare SPIONs .....                                                                        | 7 |
|    | Figure S4. EDX spectrum of the carboxyalkylphosphonic-functionalized SPIONs .....                                         | 8 |
|    | Figure S5. ATR/FT-IR spectrum of 3-phosphonopropionic (left) or 11-phosphonoundecanoic-(right) functionalized SPIONs..... | 9 |

### 1. Analysis of solvent residues by SPME-GC-MS analysis

The presence of solvent residues by SPME-GC-MS was performed using a HP 6890 Series Plus gas chromatograph (Agilent Technologies, Palo Alto, CA, USA) equipped with a MSD 5973 mass spectrometer (Agilent Technologies).

The following operating conditions were applied: carrier gas (helium) at a flow rate of 1.0 mL/min; GC injector: splitless mode at 250 °C, desorption time: 2 min; chromatographic separation on a Rxi-17Sil MS capillary column (30 m × 0.25 mm i.d., 0.25 µm film thickness; Restek, Bellafonte, USA); temperature programme: 40 °C hold 2 min, 10 °C/min to 120 °C, 15 °C/min to 180 °C, 20 °C/min to 250 °C; transfer line and ion source at 280 °C and 150 °C, respectively.

Full scan electron ionization (EI) mass spectra were acquired to select diagnostic ions ( $m/z$  ratios) used for time-scheduled selected ion monitoring (SIM), operating under the following conditions: ionization energy: 70 eV; mass range: 45–250 amu; scan time: 3 scan/s; electron multiplier voltage: 2750 V, solvent delay 1.00 min. Solvent residues were detected by operating in SIM mode using a dwell time 30 ms, monitoring the following ions:  $m/z$  57 and 86 for hexane;  $m/z$  45 and 59 for isopropanol;  $m/z$  79 and 108 for benzyl alcohol. Signal acquisition and data handling were performed using the HP Chemstation (Agilent Technologies) software.

## 2. *Figures*

- Figure S1. XRPD spectrum of bare SPIONs
- Figure S2. XPS spectrum of bare SPIONs
- Figure S3. ATR/FT-IR spectrum of bare SPIONs
- Figure S4. EDX spectrum
- Figure S5. ATR/FT-IR spectrum of 3-phosphonopropionic (left) or 11-phosphonoundecanoic-(right) functionalized SPIONs

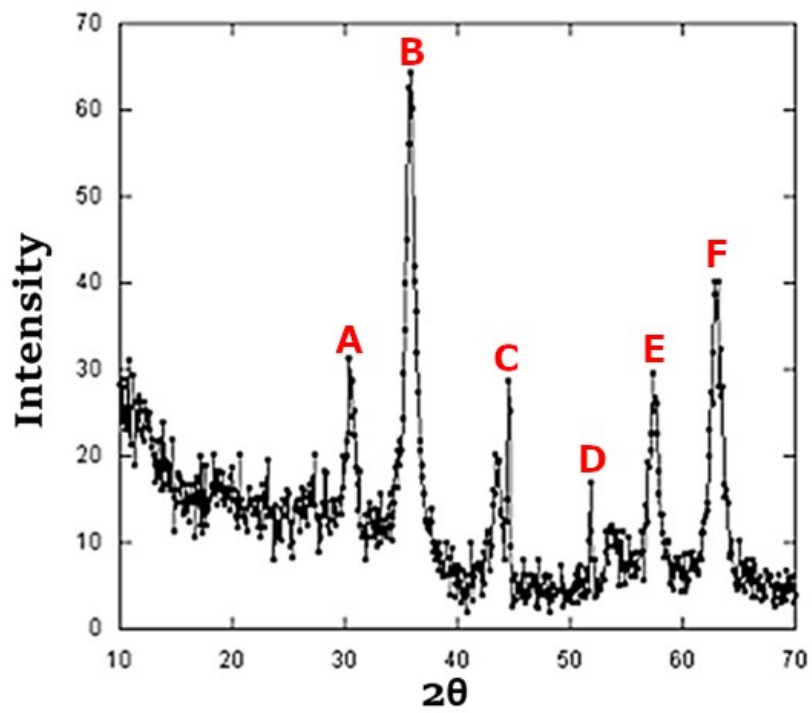

Figure S1. XRPD spectrum of bare SPIONs. The peaks related to the reflections of  $\text{Fe}_3\text{O}_4$  (JCPDS 82-1533) are highlighted: A (2 2 0), B (3 1 1), C (4 0 0), D (4 2 2), E (5 1 1) and F (4 4 0)

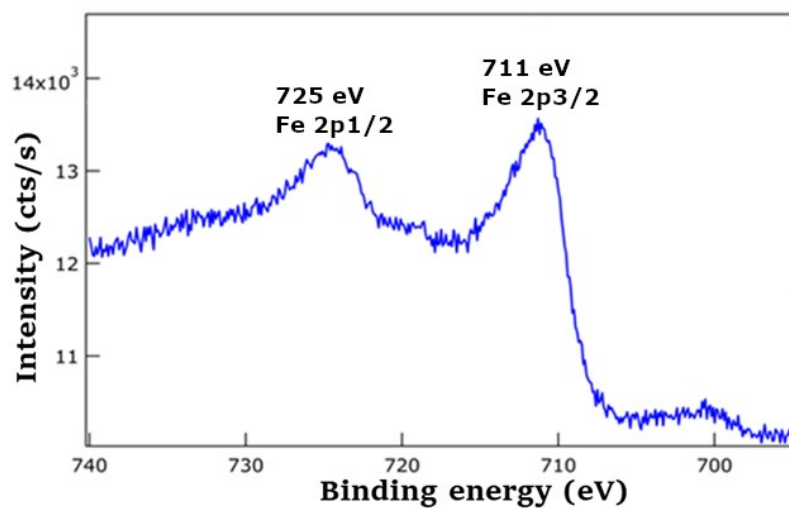

Figure S2. XPS spectrum of bare SPIONs. Peaks related to magnetite are highlighted

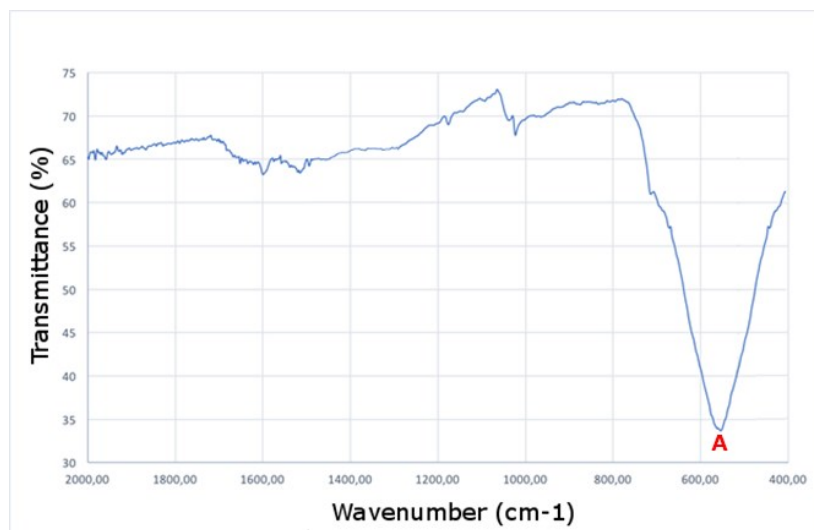

Figure S3. ATR/FT-IR spectrum of bare SPIONs. Peak A  $\nu=555\text{ cm}^{-1}$  (stretching Fe–O)

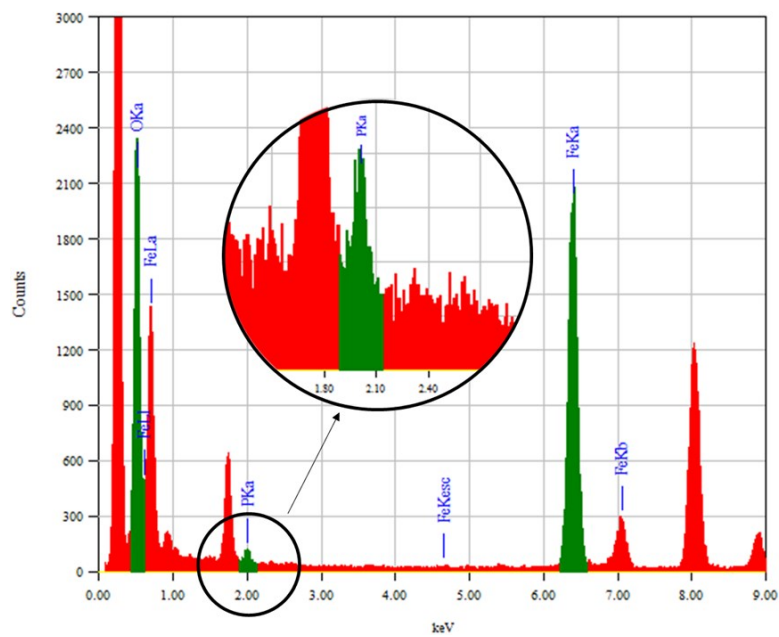

Figure S4. EDX spectrum of the carboxyalkylphosphonic-functionalized SPIONs. The insert depicts a zoom of the EDX spectrum highlighting the P peak at 2 keV



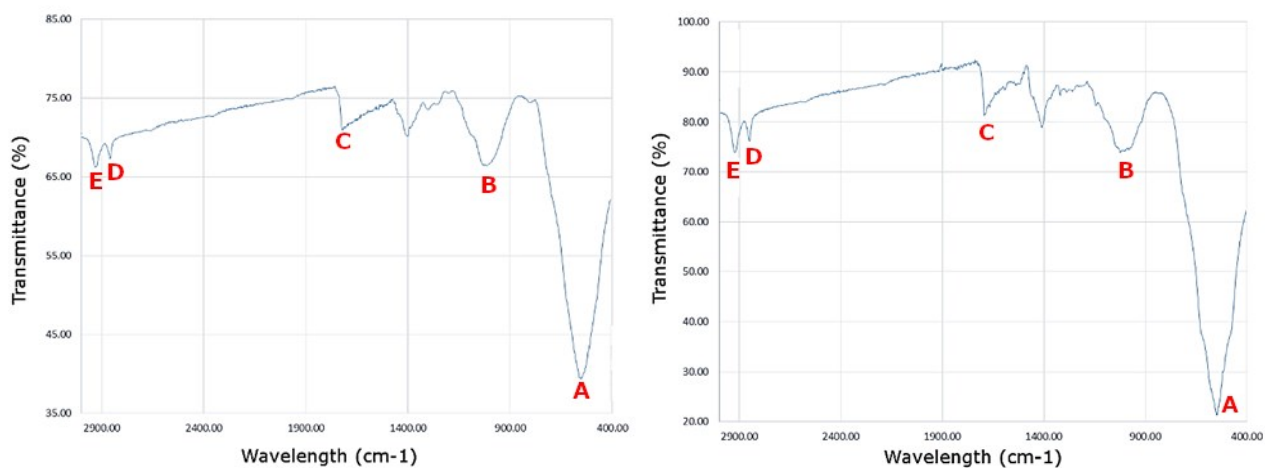

Figure S5. ATR/FT-IR spectrum of 3-phosphonopropionic (left) or 11-phosphonoundecanoic-(right) functionalized SPIONs. Peak **A**  $\nu=555\text{ cm}^{-1}$  (Fe–O stretching), **B**  $\nu=1035\text{ cm}^{-1}$  (Fe $\cdots$ P=O and Fe $\cdots$ P–O), **C**  $\nu=1710\text{ cm}^{-1}$  (C=O stretching), **D**  $\nu=2855\text{ cm}^{-1}$  (CH<sub>2</sub> symmetric stretching) and **E**  $\nu=2920\text{ cm}^{-1}$  (CH<sub>2</sub> asymmetric stretching)
